# Supplementary material
Source: publisher figshare collection journal article supplement (https://acs.figshare.com/ndownloader/files/3626082)

## Supporting Information

**Journal:** Energy & Fuels

**Manuscript ID:** ef-2015-00871b.R1

**Title:** Removal of gaseous elemental mercury by cylindrical activated coke loaded with  $\text{CoO}_x\text{-CeO}_2$  from simulated coal combustion flue gas

**Authors:** Wu, Huiyu; Caiting Li; Lingkui Zhao; Jie Zhang; Zeng, Guangming; Xie, Yin'e; Xunan Zhang; Wang, Yan

The supporting information includes 3 pages, and 1 table.

## Mercury Speciation Conversion System

To further identify the mercury speciation in the outlet flue gas, a mercury speciation conversion system coupled with RA-915M mercury analyzer was employed to measure  $\text{Hg}^0$  and  $\text{Hg}^{2+}$  concentrations in the outlet flue gas when it necessary (conditional unit). As shown in the Fig. 1, in the mercury conversion system, gas stream released from the reactor was divided into two streams, one for measuring total mercury ( $\text{Hg}^T$ ) and the other for elemental mercury ( $\text{Hg}^0$ ). On one stream, an impinger with 10 wt% acidic stannous chloride ( $\text{SnCl}_2$ ) solution was used to measure  $\text{Hg}^T$ , since acidic  $\text{SnCl}_2$  solution can reduce  $\text{Hg}^{2+}$  to  $\text{Hg}^0$  which can then be detected by the mercury analyzer. On the other stream, an impinger containing 10 wt% potassium chloride ( $\text{KCl}$ ) solution was used to measure  $\text{Hg}^0$ , because  $\text{KCl}$  solution can capture  $\text{Hg}^{2+}$  and allow only  $\text{Hg}^0$  to pass through. Before the sampling gas entered the  $\text{SnCl}_2$  solution, a 10% sodium hydroxide ( $\text{NaOH}$ ) solution was used to remove  $\text{SO}_2$ . The concentration of  $\text{Hg}^{2+}$  in outlet flue gas could then be calculated by the difference between  $\text{Hg}^T$  and  $\text{Hg}^0$ . At the end of the conversion system, the two streams converged to a 10%  $\text{NaOH}$  solution in which acid gases such as  $\text{HCl}$  and  $\text{SO}_2$  were captured to avoid corrosion of the detection cell in the mercury analyzer.

The  $\text{Hg}^0$  capture efficiency ( $E_{\text{cap}}$ ) can be defined as:

$$E_{\text{cap}}(\%) = \frac{\text{Hg}_{\text{in}}^0 - \text{Hg}_{\text{out}}^T}{\text{Hg}_{\text{in}}^0} \quad (\text{S1})$$

where  $\text{Hg}_{\text{in}}^0$  represent  $\text{Hg}^0$  concentration in inlet of the reactor, and  $\text{Hg}_{\text{out}}^T$  represent  $\text{Hg}^T$  concentration in outlet of the reactor.

**Table S1.** The Hg<sup>0</sup> removal/ capture efficiency of Co<sub>4.5</sub>Ce<sub>6</sub>/AC.

| time (h) | inlet Hg <sup>0</sup><br>(μg/m <sup>3</sup> ) | outlet Hg <sup>T</sup><br>(μg/m <sup>3</sup> ) | outlet Hg <sup>0</sup><br>(μg/m <sup>3</sup> ) | E <sub>rem</sub> (%) | E <sub>cap</sub> (%) |
|----------|-----------------------------------------------|------------------------------------------------|------------------------------------------------|----------------------|----------------------|
| 1        | 105.32                                        | 13.65                                          | 7.58                                           | 92.8                 | 87.0                 |
| 2        | 105.58                                        | 13.96                                          | 7.81                                           | 92.6                 | 86.8                 |
| 3        | 104.97                                        | 13.32                                          | 7.53                                           | 92.8                 | 87.3                 |

Mechanism of  $\text{Hg}^0$  removal by cylindrical activated coke loaded with  $\text{CoO}_x\text{-CeO}_2$ .

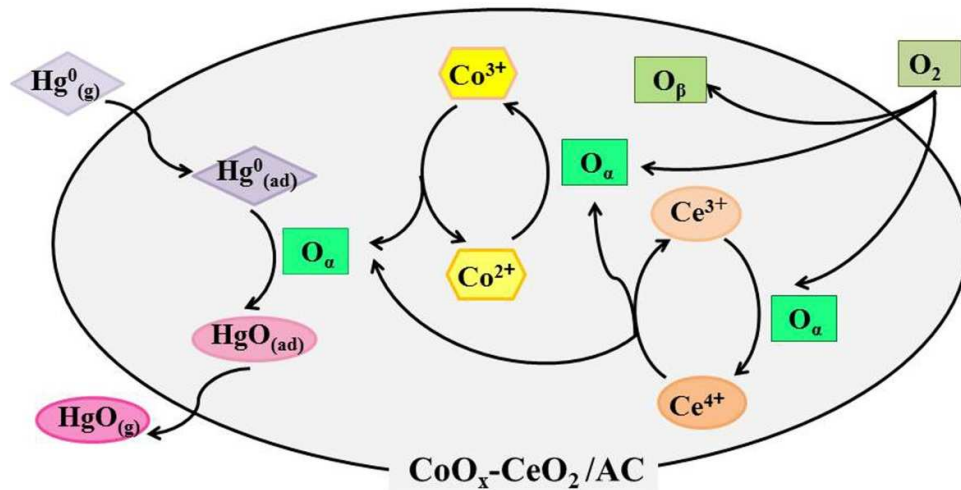

Supplement: Supplementary file 1 [file 3626082]
